# Supplementary material for: Calcium Induces the Cleavage of NopA and Regulates the Expression of Nodulation Genes and Secretion of T3SS Effectors in Sinorhizobium fredii NGR234
Source: MDPI journal article supplement (doi:10.3390/ijms25063443), 2024-03-19
Supplement: s1 [file s1]

## Supplementary Materials

**Supplementary Figure 1.** Histograms showing band intensity of Nops. Band volume of Nops were measured by densitometer scan of stained SDS-PAGE gel. Band raw volume was obtained using GelAnalyzer software v. 19.1. For comparison the band volume of molecular weight markers are also shown.

Histogram of Lane 1 from Figure 1, showing band intensity.

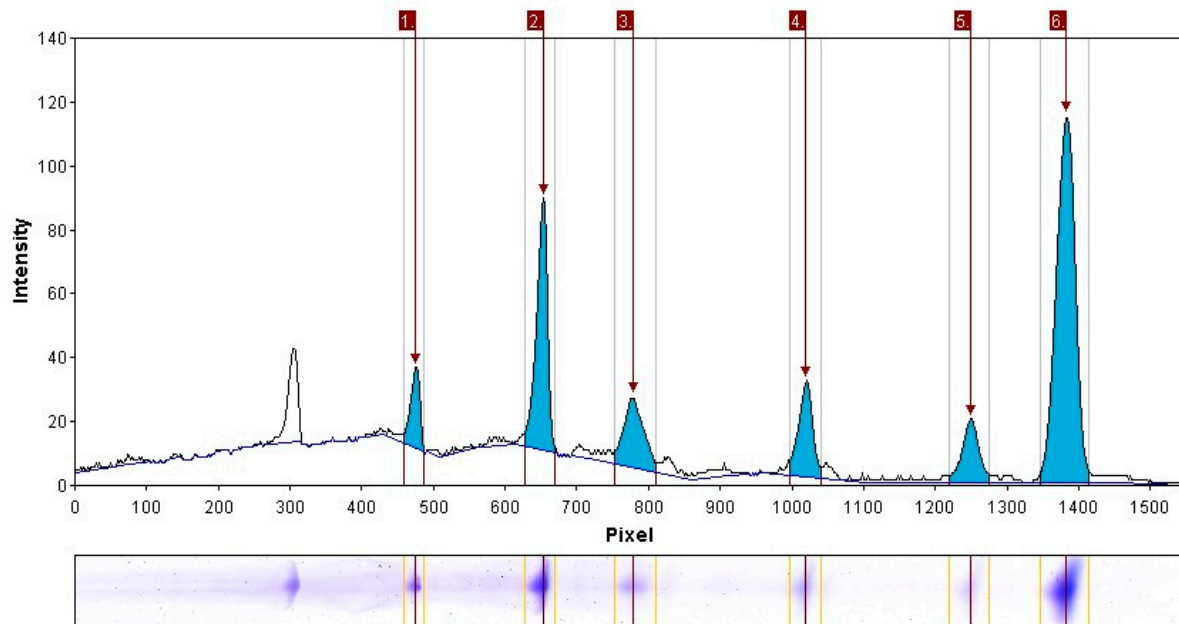

Histogram of Lane 6 from Figure 1, showing band intensity.

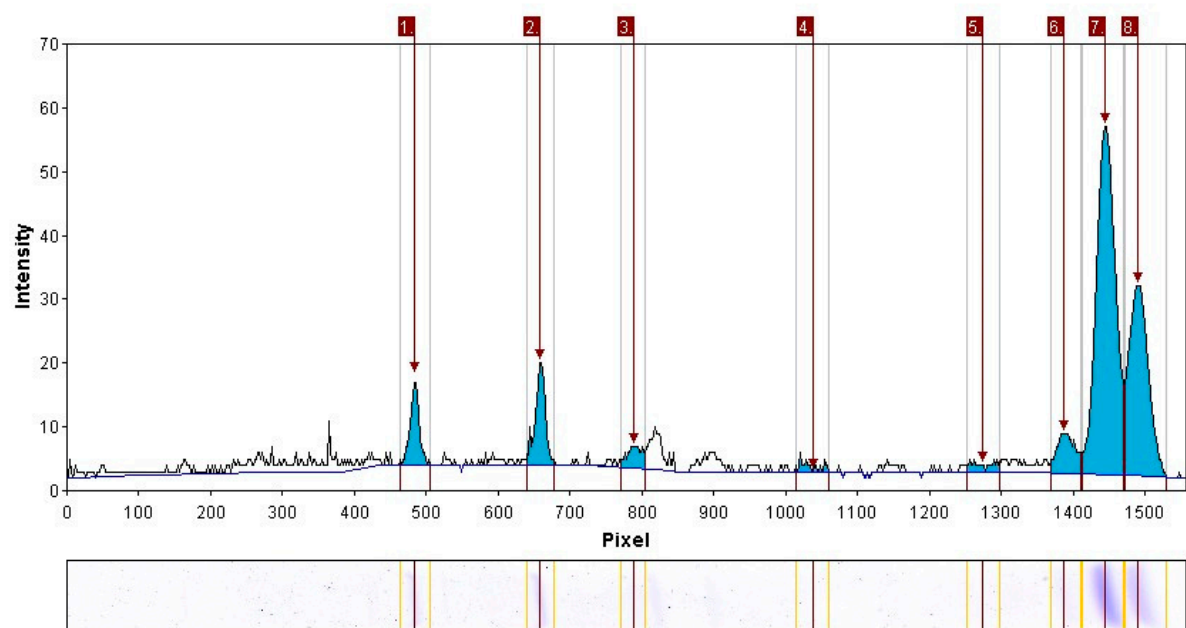

Histogram of Lane M from Figure 1 (molecular weight marker), showing band intensity.

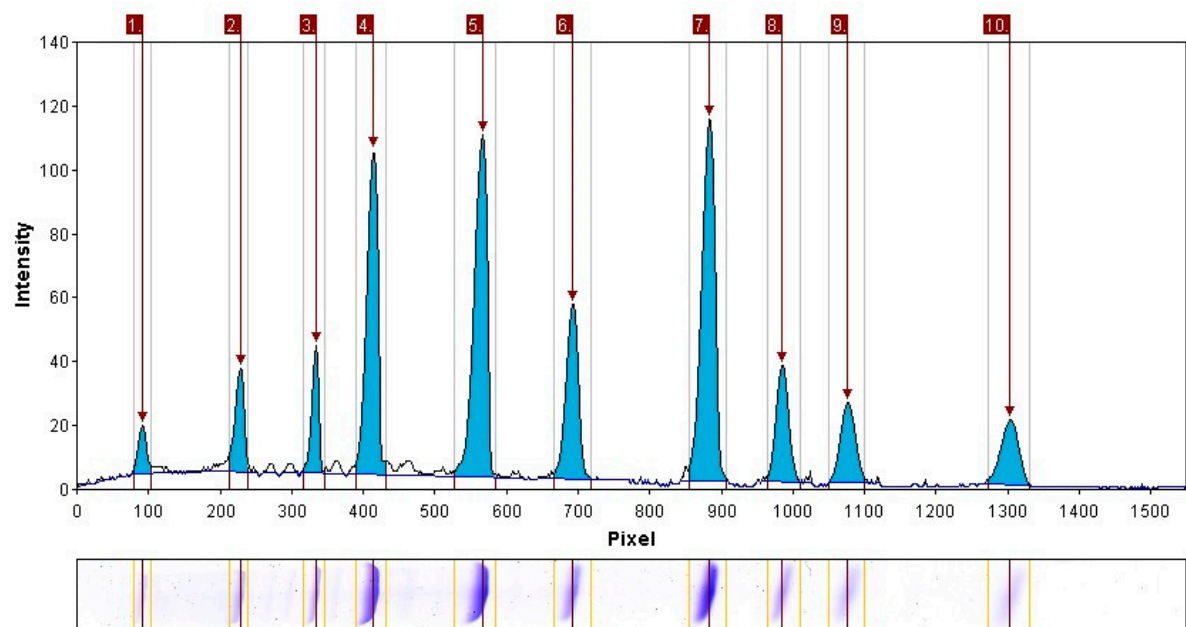

Band volume of Nops measured by densitometer scan of stained SDS-PAGE gel. Band raw volume was obtained using GelAnalyzer software v. 19.1. For comparison the band volume of molecular weight markers are also shown.

| <b>Band #</b> | <b>Nop Protein</b>   | <b>Lane 1 Volume</b> | <b>Lane 6 Volume</b> |  | <i>MW</i> | <i>Marker Volume</i> |
|---------------|----------------------|----------------------|----------------------|--|-----------|----------------------|
| <b>1</b>      | <b>NopX</b>          | <b>381</b>           | <b>193</b>           |  | 250       | 202                  |
| <b>2</b>      | <b>NopL</b>          | <b>1425</b>          | <b>265</b>           |  | 150       | 474                  |
| <b>3</b>      | <b>NopP</b>          | <b>704</b>           | <b>88</b>            |  | 100       | 476                  |
| <b>4</b>      | <b>NopB</b>          | <b>691</b>           | <b>39</b>            |  | 75        | 1893                 |
| <b>5</b>      | <b>NopC</b>          | <b>538</b>           | <b>53</b>            |  | 50        | 2316                 |
| <b>6</b>      | <b>Nop A</b>         | <b>3572</b>          | <b>183</b>           |  | 37        | 1087                 |
| <b>7</b>      | <b>Nop A product</b> | <b>---</b>           | <b>1687</b>          |  | 25        | 2468                 |
| <b>8</b>      | <b>Nop A product</b> | <b>---</b>           | <b>959</b>           |  | 20        | 777                  |
|               |                      |                      |                      |  | 15        | 625                  |
|               |                      |                      |                      |  | 10        | 570                  |

**Supplementary Figure 2.** Venn diagram of the up-regulated sets of the DEGs found in the *S. fredii* NGR234 upon treatments with apigenin, calcium, and calcium+apigenin. Apigenin, calcium, and apigenin+calcium treatment showed 31, 11, and 38 exclusive DEGs, respectively. The shared DEGs were 95 to apigenin and apigenin+calcium treatments, 23 to calcium and apigenin+calcium, and only 5 to the three conditions.

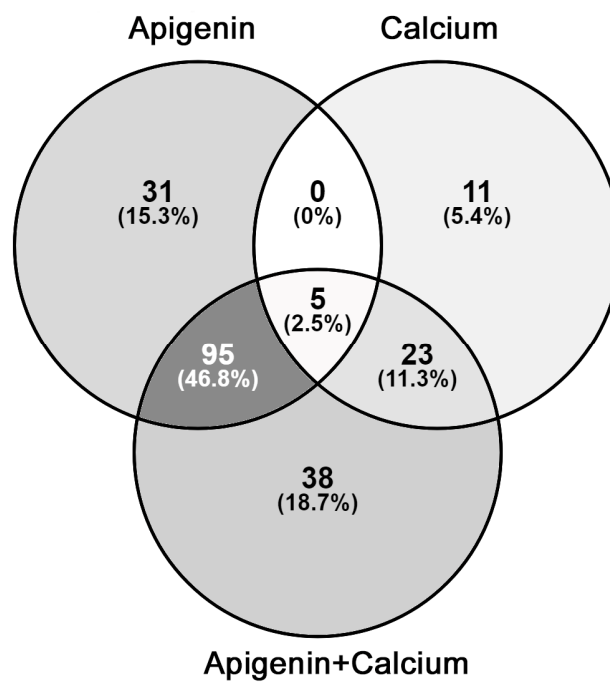

**Supplementary Figure 3.** Venn diagram of the down-regulated sets of the DEGs found in the *S. fredii* NGR234 upon treatments with apigenin, calcium, and calcium+apigenin. Apigenin, calcium, and apigenin+calcium treatment showed 11, 8, and 7 exclusive DEGs, respectively. The shared DEGs were 10 to calcium and apigenin+calcium treatments, and 5 to the three conditions. The apigenin and apigenin+calcium treatments did not share any DEG.

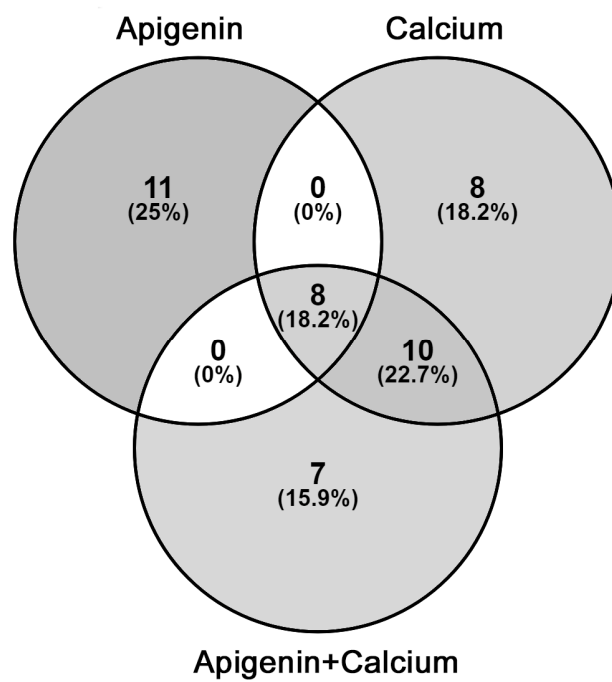

**Supplementary Figure 4.** Venn diagram of the up-regulated sets of the DEGs found in the *S. fredii* NGR234 upon treatments with apigenin and calcium+apigenin. Apigenin+calcium treatment showed 61 exclusive DEGs, 31 to apigenin treatment, and the two conditions share 100 DEGs.

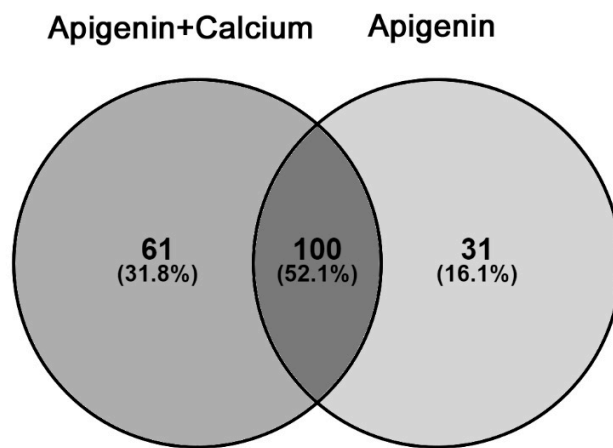

**Supplementary Table 1.** Primers used in this work.

| Oligonucleotide                   | Sequence 5'-3'                                            | Target                                                                          |
|-----------------------------------|-----------------------------------------------------------|---------------------------------------------------------------------------------|
| NGR_a03410_fw<br>NGR_a03410_rev   | GTTCAACGCAAGACCATTTGA<br>CATCGCCACCCTGATAAA               | Amplification of part of <i>nodA</i>                                            |
| NGR_a00550_fw<br>NGR_a00550_rev   | AGAACGTAGCGGCCAAAG<br>GTAACAGTGCAGTAGCATA                 | Amplification of part of <i>nopA</i>                                            |
| NGR_a00670_fw<br>NGR_a00670_rev   | AGCTCTGCTGCCTAAGATAAAG<br>CCAAGTCAGTCGCCAGTAAA            | Amplification of part of <i>rhcJ</i>                                            |
| NGR_a00470_fw<br>NGR_a00470_rev   | CTCGAGGCCCTATTGCAGTATC<br>ATGTCACGCAGCCTTGATAG            | Amplification of part of <i>syrM2</i>                                           |
| NGR_a00800_fw<br>NGR_a00800_rev   | TAAGGAGCGACGGGTATTCA<br>TAGAGACGGGTTTACGGAGAAA            | Amplification of part of <i>ttsI</i>                                            |
| NGR_b17530_fw<br>NGR_b17530_rev   | ATGAAGGCCAACCAGGAAG<br>GGTCGTCGCTGTCGAAAT                 | Amplification of part of transcriptional regulator                              |
| NGR_b20640_fw<br>NGR_b20640_rev   | TTTGA CTGTGGCGCTTCT<br>TGTTGAGCAGGATCGATGTC               | Amplification of part of <i>TRAP-T</i> family transporter                       |
| NGR_c19850_fw<br>NGR_c19850_rev   | CTGATCTGCACCAACACCAT<br>CCTCTTTCCTTGAGACGAAGTG            | Amplification of part of <i>asr</i>                                             |
| NGR_b03240_fw<br>NGR_b03240_rev   | CGTGCTGGACCTCAATCTG<br>Reverse<br>GACGACGACGATCGGAATTT    | Amplification of part of <i>LuxR</i> family transcriptional regulator           |
| NGR_c31220_fw<br>NGR_c31220_rev   | CATGCTTCCGAGATGTTCCA<br>CTTGTGGGCGAGCATCTT                | Amplification of part of <i>lpdA1</i>                                           |
| NGR_c17830_fw<br>NGR_c17830_rev   | GGATGTATTGAGAGCGTCTTT<br>CTTGAACATTGCTGCCCTTG             | Amplification of part of <i>sugar ABC</i> transporter substrate-binding protein |
| NGR_c30940_fw<br>NGR_c30940_rev   | TCATGTTCCGATCCCTTAC<br>CTCGCCGATTTGCAGAGATA               | Amplification of part of <i>glpD2</i>                                           |
| NGR_c07820_fw<br>NGR_c07820_rev   | CCAAGGATCTCCGTTTGCT<br>GCAGCACGAACTCACCATA                | Amplification of part of <i>cycL</i>                                            |
| NGR_a00400_fw<br>NGR_a00400_rev   | CCTGCGATTGAATGTGTTTACC<br>GTTGGCCTCGACATCATCTT            | Amplification of part of <i>nodZ</i>                                            |
| NGR_b18360_fw<br>NGR_b18360_rev   | AAGCTACCCGGACGACTATT<br>TGCTGAACCCTTCGGTTTG               | Amplification of part of <i>exoA</i>                                            |
| NGR_c09220_fw<br>NGR_c09220_rev   | AGATGGTTTACGGTGGTGAAG<br>TATACGAGGACCGGGTTCAT             | Amplification of part of outer membrane protein                                 |
| NGR234_16Sr_fw<br>NGR234_16Sr_rev | GCACGTAGGCGGACATTTAAGTCA<br>G<br>GCCACTGGTGTTCCTCCGAATATC | Amplification of part of 16S ribosomal RNA                                      |

| Supplementary Table 2. Number of total and mapped reads for replicates in each condition. |                         |            |                 |                 |                |               |                 |
|-------------------------------------------------------------------------------------------|-------------------------|------------|-----------------|-----------------|----------------|---------------|-----------------|
|                                                                                           | replicon                | Seq length | Total Reads     | Mapped Reads    | Unmapped Reads | %mapped Reads | %unmapped Reads |
| Wild-type_1                                                                               | pNGR234a (U00090.2)     | 536165     | 804828          | 801701          | 3127           | 99.61         | 0.39            |
|                                                                                           | pNGR234b (CP000874.1)   | 2430033    | 18596888        | 18523899        | 72989          | 99.61         | 0.39            |
|                                                                                           | Chromosome (CP001389.1) | 3925702    | 30234000        | 30112211        | 121789         | 99.60         | 0.40            |
|                                                                                           | <b>Total/Mean</b>       |            | <b>49635716</b> | <b>49437811</b> | <b>197905</b>  | <b>99.61</b>  | <b>0.39</b>     |
| Wild-type_2                                                                               | pNGR234a (U00090.2)     | 536165     | 855624          | 852407          | 3217           | 99.62         | 0.38            |
|                                                                                           | pNGR234b (CP000874.1)   | 2430033    | 20411653        | 20348312        | 63341          | 99.69         | 0.31            |
|                                                                                           | Chromosome (CP001389.1) | 3925702    | 32784939        | 32674113        | 110826         | 99.66         | 0.34            |
|                                                                                           | <b>Total</b>            |            | <b>54052216</b> | <b>53874832</b> | <b>177384</b>  | <b>99.66</b>  | <b>0.34</b>     |
| Wild-type_3                                                                               | pNGR234a (U00090.2)     | 536165     | 907197          | 903790          | 3407           | 99.62         | 0.38            |
|                                                                                           | pNGR234b (CP000874.1)   | 2430033    | 20940958        | 20874973        | 65985          | 99.68         | 0.32            |
|                                                                                           | Chromosome (CP001389.1) | 3925702    | 35870197        | 35746948        | 123249         | 99.66         | 0.34            |
|                                                                                           | <b>Total</b>            |            | <b>57718352</b> | <b>57525711</b> | <b>192641</b>  | <b>99.66</b>  | <b>0.34</b>     |
| Wild-type_Ap_1                                                                            | pNGR234a (U00090.2)     | 536165     | 2209875         | 2200835         | 9040           | 99.59         | 0.41            |
|                                                                                           | pNGR234b (CP000874.1)   | 2430033    | 14178113        | 14100560        | 77553          | 99.45         | 0.55            |
|                                                                                           | Chromosome (CP001389.1) | 3925702    | 23898500        | 23760701        | 137799         | 99.42         | 0.58            |
|                                                                                           | <b>Total</b>            |            | <b>40286488</b> | <b>40062096</b> | <b>224392</b>  | <b>99.49</b>  | <b>0.51</b>     |
| Wild-type_Ap_2                                                                            | pNGR234a (U00090.2)     | 536165     | 2140510         | 2132140         | 8370           | 99.61         | 0.39            |
|                                                                                           | pNGR234b (CP000874.1)   | 2430033    | 13991992        | 13918012        | 73980          | 99.47         | 0.53            |
|                                                                                           | Chromosome (CP001389.1) | 3925702    | 22984762        | 22860546        | 124216         | 99.46         | 0.54            |
|                                                                                           | <b>Total</b>            |            | <b>39117264</b> | <b>38910698</b> | <b>206566</b>  | <b>99.51</b>  | <b>0.49</b>     |
| Wild-type_Ap_3                                                                            | pNGR234a (U00090.2)     | 536165     | 4725217         | 4710307         | 14910          | 99.68         | 0.32            |
|                                                                                           | pNGR234b (CP000874.1)   | 2430033    | 30538295        | 30414924        | 123371         | 99.60         | 0.40            |
|                                                                                           | Chromosome (CP001389.1) | 3925702    | 50863134        | 50648487        | 214647         | 99.58         | 0.42            |
|                                                                                           | <b>Total</b>            |            | <b>86126646</b> | <b>85773718</b> | <b>352928</b>  | <b>99.62</b>  | <b>0.38</b>     |
| Wild-type_Ca_1                                                                            | pNGR234a (U00090.2)     | 536165     | 634856          | 631940          | 2916           | 99.54         | 0.46            |
|                                                                                           | pNGR234b (CP000874.1)   | 2430033    | 15821383        | 15740104        | 81279          | 99.49         | 0.51            |
|                                                                                           | Chromosome (CP001389.1) | 3925702    | 26281153        | 26135572        | 145581         | 99.45         | 0.55            |



|                  |                         |         |                 |                 |               |              |             |
|------------------|-------------------------|---------|-----------------|-----------------|---------------|--------------|-------------|
|                  | <b>Total</b>            |         | <b>42737392</b> | <b>42507616</b> | <b>229776</b> | <b>99.49</b> | <b>0.51</b> |
| Wild-type_Ca_2   | pNGR234a (U00090.2)     | 536165  | 619699          | 616867          | 2832          | 99.54        | 0.46        |
|                  | pNGR234b (CP000874.1)   | 2430033 | 15490505        | 15408323        | 82182         | 99.47        | 0.53        |
|                  | Chromosome (CP001389.1) | 3925702 | 25539792        | 25393213        | 146579        | 99.43        | 0.57        |
|                  | <b>Total</b>            |         | <b>41649996</b> | <b>41418403</b> | <b>231593</b> | <b>99.48</b> | <b>0.52</b> |
| Wild-type_Ca_3   | pNGR234a (U00090.2)     | 536165  | 650355          | 647457          | 2898          | 99.55        | 0.45        |
|                  | pNGR234b (CP000874.1)   | 2430033 | 16553146        | 16469024        | 84122         | 99.49        | 0.51        |
|                  | Chromosome (CP001389.1) | 3925702 | 27142679        | 26994394        | 148285        | 99.45        | 0.55        |
|                  | <b>Total</b>            |         | <b>44346180</b> | <b>44110875</b> | <b>235305</b> | <b>99.50</b> | <b>0.50</b> |
| Wild-type_ApCa_1 | pNGR234a (U00090.2)     | 536165  | 3535006         | 3524321         | 10685         | 99.70        | 0.30        |
|                  | pNGR234b (CP000874.1)   | 2430033 | 16238057        | 16186563        | 51494         | 99.68        | 0.32        |
|                  | Chromosome (CP001389.1) | 3925702 | 32575707        | 32461574        | 114133        | 99.65        | 0.35        |
|                  | <b>Total</b>            |         | <b>52348770</b> | <b>52172458</b> | <b>176312</b> | <b>99.68</b> | <b>0.32</b> |
| Wild-type_ApCa_2 | pNGR234a (U00090.2)     | 536165  | 3399174         | 3389120         | 10054         | 99.70        | 0.30        |
|                  | pNGR234b (CP000874.1)   | 2430033 | 16152618        | 16103556        | 49062         | 99.70        | 0.30        |
|                  | Chromosome (CP001389.1) | 3925702 | 28245060        | 28150024        | 95036         | 99.66        | 0.34        |
|                  | <b>Total</b>            |         | <b>47796852</b> | <b>47642700</b> | <b>154152</b> | <b>99.69</b> | <b>0.31</b> |
| Wild-type_ApCa_3 | pNGR234a (U00090.2)     | 536165  | 3583779         | 3572001         | 11778         | 99.67        | 0.33        |
|                  | pNGR234b (CP000874.1)   | 2430033 | 17304645        | 17246990        | 57655         | 99.67        | 0.33        |
|                  | Chromosome (CP001389.1) | 3925702 | 30264642        | 30153312        | 111330        | 99.63        | 0.37        |
|                  | <b>Total</b>            |         | <b>51153066</b> | <b>50972303</b> | <b>180763</b> | <b>99.66</b> | <b>0.34</b> |

**Supplementary Table 3.** Mass spectrometric identification of amino acid sequences of NGR234 low molecular weight proteins isolated from acrylamide gels.

| Protein ID<br>----<br>Accession                                                                              | Mascot<br>Score | Peptides<br>(Unique Spectra)<br>----<br>% Coverage | MW Thr. / Exp. | (Position)      Peptide Matched                                                                                                                                                                                                                                                                                           |
|--------------------------------------------------------------------------------------------------------------|-----------------|----------------------------------------------------|----------------|---------------------------------------------------------------------------------------------------------------------------------------------------------------------------------------------------------------------------------------------------------------------------------------------------------------------------|
| Band A<br>Nodulation protein NopA<br>( <i>Sinorhizobium fredii</i> )<br>----<br>AY775562.2<br>(gil499177556) | 1536            | 8 (21)<br>----<br>100%                             | 7,004 / 7,000  | (1-25)      (-)MSKIGTLTSAVGAGAAAGQNVAAK(G)<br>(3-25)      (K)IGTLTSAVGAGAAAGQNVAAK(G)<br>(5-25)      (G)TLTSAVGAGAAAGQNVAAK(G)<br>(24-49)      (K)GAGAAAFQAQIAELAAVSAEATAR(S)<br>(31-49)      (F)QAQIAELAAVSAEATAR(S)<br>(48-64)      (R)SMLLRVTTELQTTK(K)<br>(53-64)      (R)TVTTELQTTK(K)<br>(64-71)      (K)AADERVQ(-) |
| Band B<br>Nodulation protein NopA<br>( <i>Sinorhizobium fredii</i> )<br>----<br>AY775562.2<br>(gil499177556) | 1061            | 4 (12)<br>----<br>85%                              | 7,004 / 4,000  | (3-25)      (K)IGTLTSAVGAGAAAGQNVAAK(G)<br>(29-49)      (A)AFQAQIAELAAVSAEATAR(S)<br>(53-64)      (R)TVTTELQTTK(K)<br>(64-71)      (K)AADERVQ(-)                                                                                                                                                                          |
| Band C<br>Nodulation protein NopA<br>( <i>Sinorhizobium fredii</i> )<br>----<br>AY775562.2<br>(gil499177556) | 465             | 4 (7)<br>----<br>87%                               | 7,004 / 3,000  | (3-25)      (K)IGTLTSAVGAGAAAGQNVAAK(G)<br>(29-49)      (A)AFQAQIAELAAVSAEATAR(S)<br>(48-64)      (S)MLLRVTTELQTTK(K)<br>(64-71)      (K)AADERVQ(-)                                                                                                                                                                       |
